1 **Unbiased whole genomes from mammalian feces using fluorescence-activated cell sorting**

2

3

4 Joseph D. Orkin<sup>1,2\*</sup>, Marc de Manuel<sup>3</sup>, Roman Krawetz<sup>4</sup>, Javier del Campo<sup>5</sup>, Claudia Fontserè<sup>3</sup>,  
5 Lukas F. K. Kuderna<sup>3</sup>, Ester Lizano<sup>3</sup>, Jia Tang<sup>6</sup>, Tomas Marques-Bonet<sup>3,7,8,9</sup>, Amanda D.  
6 Melin<sup>1,2</sup>

7

8

9 1. Department of Anthropology & Archaeology, University of Calgary, Calgary, Alberta, Canada

10

11 2. Alberta Children's Hospital Research Institute, University of Calgary, Calgary, Alberta, Canada

12

13 3. Institute of Evolutionary Biology (UPF-CSIC), PRBB, Dr. Aiguader 88, 08003 Barcelona, Spain.

14

15 4. Department of Cell Biology and Anatomy, University of Calgary, Calgary, Alberta, Canada

16

17 5. Department of Marine Biology and Oceanography, Institut de Ciències del Mar (Consejo  
18 Superior de Investigaciones Científicas), Barcelona, Catalonia, Spain

19

20 6. Department of Biological Sciences, University of Calgary, Calgary, Alberta, Canada

21

22 7. Catalan Institution of Research and Advanced Studies (ICREA), Passeig de Lluís Companys, 23,  
23 08010, Barcelona, Spain

24

25 8. CNAG-CRG, Centre for Genomic Regulation (CRG), Barcelona Institute of Science and  
26 Technology (BIST), Baldori i Reixac

27

28 9. Institut Català de Paleontologia Miquel Crusafont, Universitat Autònoma de Barcelona, Edifici  
29 ICTA-ICP, c/ Columnes s/n, 08193 Cerdanyola del Vallès, Barcelona, Spain

30

31 **\*Corresponding Author:**

32 Joseph D. Orkin (joseph.orkin@ucalgary.ca)

33

34

35  
36

## ABSTRACT

37 Non-invasive genomic research on free-ranging mammals typically relies on the use of  
38 fecal DNA. This requires the isolation and enrichment of endogenous DNA, given its small  
39 proportion compared to bacterial DNA. Current approaches for acquiring large-scale genomic  
40 data from feces rely on bait-and-capture techniques. While this technique has greatly improved  
41 our understanding of mammalian population genomics, it is limited by biases inherent to the  
42 capture process, including allele dropout, low mapping rates, PCR duplication artifacts, and  
43 structural biases. We report here a new method for generating whole mammalian genomes from  
44 feces using fluorescence-activated cell sorting (FACS). Instead of enriching endogenous DNA  
45 from extracted fecal DNA, we isolated mammalian cells directly from feces. We then built  
46 fragment libraries with low input material from commercially available kits, which we  
47 sequenced at high and low coverage. We validated this method on feces collected from primates  
48 stored in RNAlater for up to three years. We sequenced one fecal genome at high coverage  
49 (12X) and 15 additional fecal genomes at low coverage (0.1X - 4X). For comparative purposes,  
50 we also sequenced DNA from nine blood or tissue samples opportunistically collected from  
51 capuchin monkeys that died of natural causes or were treated in a local rehabilitation center.  
52 Across all fecal samples, we achieved median mapping and duplication rates of 82% and 6%,  
53 respectively. Our high-depth fecal genome did not differ in the distribution of coverage,  
54 heterozygosity, or GC content from those derived from blood or tissue origin. As a practical  
55 application of our new approach with low coverage fecal genomes, we were able to resolve the  
56 population genetic structure of capuchin monkeys from four sites in Costa Rica.

57

## INTRODUCTION

Advances in DNA sequencing technology have allowed for great strides to be made in comparative genomics (Arandjelovic & Vigilant, 2018; Corlett, 2017; Perry, 2014). It is now commonplace in a single study of a non-model organism to sequence partial genomes from multiple individuals. If fresh tissue or blood samples can be acquired from a handful of individuals, sequencing a *de novo* reference genome or generating a panel of single nucleotide variants is relatively straightforward. However, answering population level questions typically depends upon the non-invasive collection of fecal samples from free-ranging animals. Unfortunately, less than 5% of the extracted DNA from a fecal sample typically originates from an endogenous source (i.e. the host animal) (Hernandez-Rodriguez et al., 2017; Snyder-Mackler et al., 2016), while the remaining 95% comes from microorganisms and dietary items. For many species, this combination of factors makes it unfeasible to sequence whole genomes at high coverage from a large number of individuals. The resulting dearth of population-wide high-coverage genomes limits the scope of questions that can be asked and answered in genomics, ecology, and conservation.

Thanks to recent advances in non-invasive genomics, it has become possible to sequence partial genomes by enriching the proportion of endogenous DNA in feces (Chiou & Bergey, 2018; Perry, Marioni, Melsted, & Gilad, 2010; Snyder-Mackler et al., 2016). Through the use of targeted bait-and-capture and reduced representation libraries, this approach allows for the sequencing of single nucleotide variant (SNV) sets, which has begun to provide important insights into population structure and local adaptation of free-ranging mammals (Chiou, 2017; de Manuel et al., 2016; Wall et al., 2016). Despite the promise of this approach, DNA enrichment suffers from biases and impracticalities that limit its ability to uniformly cover a genome. Current bait-and-capture techniques are subject to inherent biases in the type of DNA captured (e.g. non-repetitive elements, GC content, reduced representation libraries, inconsistent hybridization); requires the costly and time consuming generation of RNA or DNA baits; have limited ability to enrich endogenous DNA (mean: ~57% of mapped reads (Snyder-Mackler et al., 2016)); and have high average PCR duplication rates (mean: ~38% of mapped reads (Snyder-Mackler et al., 2016)). Methylation-based enrichment offers a promising and cost-effective alternative to bait-and-capture for SNV generation, although it also suffers from inherent bias in the composition of the enriched libraries, and has limited enrichment capacity (mean: <50% of mapped reads (Chiou & Bergey, 2018)). While both approaches are viable for partial data, neither offers the realistic possibility of truly unbiased, cost-effective whole genome sequencing.

Through a novel application of fluorescence-activated cell sorting (FACS), we present a rapid, cost-effective method of isolating a host animal's intestinal epithelial cells for DNA extraction and genome sequencing. With this approach, we have routinely mapped more than 80% of reads to the host genome, strongly suggesting they are from endogenous DNA. This method requires no targeted enrichment of DNA, RNA baits, or methylation. It allows for DNA to be extracted and libraries built with commercially available kits, removing many of the challenges of enrichment-based techniques. Furthermore, our method allows for the long-term, room-temperature stabilization of samples, making it possible for field workers to collect samples with ease from remote areas without the need for temperature sensitive storage.

Here, we propose a novel protocol to isolate intestinal epithelial cells from the feces of white-faced capuchin monkeys (*Cebus imitator*) up to three years after initial collection. From these cells, we generated low coverage genomes from 17 fecal samples and selected one of them

104 for deeper sequencing (targeting ~10X - 15X coverage). In so doing, we have generated the first  
105 uniformly-distributed, high-coverage, whole genome of a mammal from its feces. To  
106 demonstrate the breadth of fecal FACS, we also conducted an analysis of population genetic  
107 structure in two Costa Rican forest reserves using DNA derived from both fecal FACS and  
108 traditional blood/tissue extractions.

109  
110

## METHODS

### 111 2.1 Sample Collection

112 We collected fecal samples from free-ranging white-faced capuchin monkeys (*Cebus*  
113 *imitator*) at Sector Santa Rosa (SSR), part of the Área de Conservación Guanacaste in  
114 northwestern Costa Rica, which is a 163,000 hectare tropical dry forest nature reserve (Figure 1).  
115 Behavioral research of free-ranging white-faced capuchins has been ongoing at SSR since the  
116 1980's which allows for the reliable identification of known individuals from facial features and  
117 bodily scars (Fedigan & Rose-Wiles, 1996). We collected 14 fresh fecal samples from 12 white-  
118 faced capuchin monkeys immediately following defecation (Table 1). We placed 1 mL of feces  
119 into conical 15 mL tubes pre-filled with 5 mL of RNAlater. RNAlater preserved fecal samples  
120 were sent to the University of Calgary, where they were stored at room temperature for up to  
121 three years. To evaluate other preservation methods, we also collected two additional capuchin  
122 monkey fecal samples (SSR-FL and a section of SSR-ML) and one spider monkey (*Ateles*  
123 *geoffroyi*) fecal sample, which we stored in 1X PBS buffer and then froze in liquid nitrogen with  
124 a betaine cryopreservative (Rinke et al., 2014). Given the logistical challenges of carrying liquid  
125 nitrogen to remote field sites, we prioritized evaluation of samples stored in RNAlater.

126 Finally, we took tissue and blood samples opportunistically. During the course of our  
127 study, 4 individual capuchin monkeys died of natural causes at SSR, from whom we were able to  
128 collect tissue samples, which we stored in RNAlater. By collaborating with *Kids Saving the*  
129 *Rainforest* veterinary rehabilitation clinic in Quepos, Costa Rica, we acquired blood samples  
130 from 5 more Costa Rican white-faced capuchins who were undergoing treatment at the facility  
131 (although we were unable to collect paired fecal samples). Samples were collected with  
132 permission from the Area de Conservacion Guanacaste (ACG-PI-033-2016) and CONAGEBIO  
133 (R-025-2014-OT-CONAGEBIO). Samples were exported from Costa Rica under permits from  
134 CITES and Area de Conservacion Guanacaste (2016-CR2392/SJ #S 2477, 2016-CR2393/SJ #S  
135 2477, DGVS-030-2016-ACG-PI-002-2016; 012706) and imported with permission from the  
136 Canadian Food and Inspection agency (A-2016-03992-4).

137

### 138 2.2 FACS

139 Before isolating cells by Fluorescence-activated cell sorting (FACS), fecal samples were  
140 prepared using a series of washes and filtration steps. Fecal samples were vortexed for 30 s and  
141 centrifuged for 30 s at 2,500 g. Then the supernatant was passed through a 70 um filter into a 50  
142 mL tube and washed with DPBS. After transferring the resultant filtrate to a 15 mL tube, it was  
143 centrifuged at 1,500 RPM for 5 minutes to pellet the cells. Then we twice washed the cells with  
144 13 mL of DPBS. We added 500 uL of DPBS to the pellet and re-filtered through a 35 um filter  
145 into a 5 mL FACS tube. We prepared a negative control (to control for auto-fluorescence) with  
146 500 uL of DPBS and one drop of the cell solution. To the remaining solution, we added 1 uL of  
147 AE1/AE3 Anti-Pan Cytokeratin Alexa Fluor® 488 antibody or TOTO-3 DNA stain, which we  
148 allowed to incubate at 4°C for at least 30 minutes.

149 We isolated cells using a BD FACSAria™ Fusion (BD Biosciences) flow cytometer at the  
150 University of Calgary Flow Cytometry Core. To sterilize the cytometer's fluidics before  
151 processing each sample, we ran a 3% bleach solution through the system for four minutes at  
152 maximum pressure. We assessed background fluorescence and cellular integrity, by processing  
153 the negative control sample prior to all prepared fecal samples. For each sample we first gated  
154 our target population by forward and side scatter characteristics that were likely to minimize  
155 bacteria and cellular debris (Figure 2). Secondary and tertiary gates were implemented to remove  
156 cellular agglomerations. Finally, we selected cells with antibody or DNA fluorescence greater  
157 than background levels. In cases when staining was not effective, we sorted solely on the first  
158 three gates. Cells were pelleted and frozen at -20°C.

159

### 160 2.3 DNA Extraction and Shotgun Sequencing

161 We extracted fecal DNA (fDNA) with the QIAGEN DNA Micro kit, following the  
162 “Small volumes of blood” protocol. To improve DNA yield, we increased the lysis time to three  
163 hours, and incubated 50 µL of 56°C elution buffer on the spin column membrane for 10 minutes.  
164 DNA concentration was measured with a Qubit fluorometer. Additionally, to calculate  
165 endogenous DNA enrichment, we extracted DNA directly from five fecal samples prior to their  
166 having undergone FACS. We extracted DNA from the nine tissue and blood samples using the  
167 QIAGEN Genra Puregene Tissue kit and DNeasy blood and tissue kit, respectively.

168 For the fecal samples, DNA was fragmented to 350 bp with a Covaris sonicator. We built  
169 whole genomic sequencing libraries with the NEB Next Ultra 2 kit using 10-11 PCR cycles.  
170 Fecal genomic libraries were sequenced on an Illumina NextSeq (2x150 PE) at the University of  
171 Calgary genome sequencing core. We resequenced one fecal sample at high coverage on an  
172 Illumina HighSeq 4000 at the McDonnell Genome Institute at Washington University in St.  
173 Louis (MGI). High-coverage, whole genomic shotgun libraries were prepared for the blood and  
174 tissue DNA samples and sequenced on an Illumina X-10 at MGI.

175

### 176 2.3 Mapping and SNV Generation

177 Reads were trimmed of sequencing adaptors with Trimmomatic (Bolger, Lohse, &  
178 Usadel, 2014). Subsequently, we mapped the *Cebus* reads to the *Cebus imitator* 1.0 reference  
179 genome ([GCF\\_001604975.1](https://doi.org/10.1101/001604975.1)) with BWA mem (Li & Durbin, 2009) and removed duplicates with  
180 Picard Tools (<http://broadinstitute.github.io/picard/>). We called SNVs for each sample  
181 independently using the *Cebus* genome and the GATK UnifiedGenotyper pipeline (-out\_mode  
182 EMIT\_ALL\_SITES) (McKenna et al., 2010). Genomic VCFs were then combined using GATK's  
183 CombineVariants restricting to positions with a depth of coverage between 3 and 100, mapping  
184 quality above 30, no reads with mapping quality zero and variant PHRED scores above 30.  
185 Sequencing reads from one of the high coverage fecal samples (SSR-FL) bore a strong signature  
186 of human contamination (16%), and were thus excluded from SNV generation. We included  
187 reads from nine tissue/blood samples and one frozen fecal sample with high coverage (SSR-ML).  
188 In total, we generated 4,184,363 SNVs for downstream analyses.

189 To remove potential human contamination from sequenced libraries, we mapped trimmed  
190 reads to the *Cebus imitator* 1.0 and human (hg38) genomes simultaneously with BBsplit  
191 (Bushnell, 2016). Using default BBsplit parameters, we binned separately reads that mapped  
192 unambiguously to either genome. Ambiguously mapping reads (i.e. those mapping equally well  
193 to both genomes) were assigned to both genomic bins, and unmapped reads were assigned to a  
194 third bin. We calculated the amount of human genomic contamination as the percentage of total



195 reads unambiguously mapping to the human genome (Table 2). After removing contaminant  
196 reads, all libraries with at least 0.5X genomic coverage were used for population analysis.

197 In order to test the effect of fecal FACS on mapping rates, we selected five samples at  
198 random (SSR-CH, SSR-NM, SSR-LE, SSR-PR, SSR-SN) to compare pre- and post-FACS  
199 mapping rates. To test for an increase in mapping percentage, we ran a one-sample paired  
200 Wilcoxon signed-rank test on the percentages of reads that mapped exclusively to the *Cebus*  
201 genome before and after flow FACS. Additionally, we ran Pearson's product moment  
202 correlations to test for an effect of the number of cells (log10 transformed) on rates of mapping,  
203 read duplication, and ng of input DNA. The above tests were all performed in R.

204

### 205 2.5 High coverage fecal genome comparison

206 We made several comparisons between our high-coverage feces-derived genome and the  
207 blood/tissue-derived genomes using window-based approaches. For each test, the feces-derived  
208 genome should fall within the range of variation for members of its population of origin (SSR).  
209 Deviations from this, for examples all fecal genomes clustering together, would indicate biases  
210 in our DNA isolation methods. To assess this, we constructed 10 KB / 4KB sliding windows  
211 along the largest scaffold (21,314,911 bp) in the *C. imitator* reference genome. From these  
212 windows, we constructed plots of coverage density and the distribution of window coverage  
213 along the scaffold. Secondly, we assessed the level of heterozygosity in 1 MB / 200 KB sliding  
214 windows throughout the ten largest scaffolds. For each high-coverage genome, we plotted the  
215 density distribution of window heterozygosity. We measured genome-wide GC content with the  
216 Picard Tools CollectGcBiasMetrics function. The percentage of GC content was assessed against  
217 the distribution of normalized coverage and the number of reads in 100 bp windows per the  
218 number reads aligned to the windows.

219

### 220 2.6 Population genomic analysis

221 Given the large degree of difference in coverage among our samples, (less than 1X to  
222 greater than 50X), we performed pseudodiploid allele calling on all samples using custom  
223 scripts. For each library, at each position in the SNV set, we selected a single, random read from  
224 the sequenced library. From that read, we called the variant information at the respective SNV  
225 site for the given library. In so doing, we generated a VCF with a representative degree of  
226 variation and error for all samples.

227 To assess population structure and infer splits between northern and southern groups of  
228 Costa Rican white-faced capuchins, we constructed principal components plots with  
229 EIGENSTRAT (Price et al., 2006) and built population trees with TreeMix (Pickrell & Pritchard,  
230 2012). Because we ascertained variants predominantly with libraries that were of tissue/blood  
231 origin, we built principal components solely with SNVs from these libraries and projected the  
232 remaining fecal libraries onto the principal components. For our maximum likelihood trees, we  
233 used three outgroups (*Ateles geoffroyi*, *Saimiri sciureus*, and *Cebus albifrons*), with *A. geoffroyi*  
234 serving as the root of the tree. Given the geographic distance and anthropogenic deforestation  
235 between northern and southern populations, we assumed no migration. To account for linkage  
236 disequilibrium, we grouped SNVs into windows of 1,000 SNVs.

237

238

## 238 RESULTS

239

### 240 3.1 Isolation of intestinal epithelial cells using Fluorescence-activated cell sorting (FACS)

241 Flow cytometry can be used to discriminate among categories of cells by examining the  
242 manner in which light scatters in response to cellular properties. We interpreted forward scatter  
243 (FSC) and side scatter (SSC) as measures of cellular size and granularity (complexity),  
244 respectively. When cells are intact, free of agglomerations, and of limited variety, they form  
245 easily identifiable clusters, particularly when bound with fluorescently labeled antibodies. In  
246 contrast to this idealized schema, abundant cellular debris prevented us from observing distinct  
247 cellular populations when assessing the relationship between FSC and SSC (Figure 2) of fecal  
248 samples. The vast majority of events were usually clustered in lower range of FSC, and likely of  
249 bacterial origin. To exclude bacteria insofar as possible, we implemented a FSC gate that only  
250 included events above this cluster, typically the top  $\frac{1}{2}$  to  $\frac{2}{3}$  of the FSC range. From the 14  
251 RNAlater preserved capuchin fecal samples, we isolated a median of 1,739 cells, with a range of  
252 129 - 62,201 (Table 2). Typically, we collected a few hundred or thousand cells, but in two cases  
253 of poor fluorescent staining (SSR-FN and the RNAlater preserved SSR-ML sample), we sorted  
254 the larger gated populations, irrespective of fluorescent intensity. From the frozen samples, SSR-  
255 FL and SSR-ML, we collected 4,405 and 2,546 cells, respectively. Similarly, from the spider  
256 monkey sample, which we split into two separate FACS runs, we isolated 4,026 and 602 cells.  
257

### 258 3.2 Mapping of genomic libraries

259 From each cellular population, we successfully extracted DNA and prepared sequencing  
260 libraries. Among the RNAlater preserved capuchin samples, the total amount of DNA per sample  
261 was low, ranging from 2.96 to 21.50 ng, with a median value of 7.85 ng (Table 2). A relationship  
262 between the number of cells was not significantly correlated with the amount of extracted DNA  
263 ( $R=0.227$ ; 95% CI (-0.345, 0.676);  $t=0.808$ ,  $p > 0.05$ ) or mapping rate ( $R = -0.204$ ; 95% CI (-  
264 0.663, 0.367);  $t = -0.721$ ;  $p > 0.05$ ). Median mapping rates reached 93% (range: 55 - 98%) with  
265 BWA-MEM and 82% (range: 11 - 95%) with the more stringent BBsplit settings (Figures 3A,  
266 3B, Table 2). Read duplication levels were low, with a median value of 9% (range: 2 - 40%)  
267 resulting in 63% (range: 8 - 92%) of reads being unique and mapping to the *Cebus imitator* 1.0  
268 genome. The amount of duplicate reads was distributed bimodally across individuals, with reads  
269 from five samples having substantially higher duplication rates than the remaining nine. The rate  
270 of duplication was significantly correlated ( $R = -0.751$ ; 95% CI (-0.917, -0.366);  $t = -3.94$ ;  $p <$   
271  $0.01$ ) with the number of cells (log<sub>10</sub> transformed), decreasing sharply above a threshold of  
272 about 1,000 cells (Figure 3D).

273 The samples frozen in liquid nitrogen mapped at comparable rates to those preserved in  
274 RNAlater. From the two frozen capuchin samples, SSR-ML and SSR-FL, respectively, we  
275 extracted 10.50 and 6.72 ng of DNA. These two samples mapped at 96% and 80.4% with BWA-  
276 MEM and 90% and 42% with BBsplit (5% and 3% duplicates), respectively. We extracted 6.96  
277 and 4.50 ng of DNA from the two runs of the spider monkey sample, which mapped at a  
278 substantially lower rate of 54% and 49% with BWA-MEM and 12% with BBsplit for both (1%  
279 duplicates for both).

280 We observed little to no human contamination in the RNAlater preserved samples. For  
281 nine of the 14 samples, BBsplit mapped between 0.61 and 1.25% of reads to hg38 (median  
282 0.96%); however, in four cases 2.86 - 5.80% of reads were binned to the human genome. Human  
283 mapped reads were also low for the frozen SSR-ML (1.25%) and spider monkey (2.83% and  
284 1.82%) samples. However, SSR-FL appeared to have substantial human contamination (15.77%  
285 of reads). This may be due to initial processing of these three samples, which were stored using  
286 the cryopreservation method, at the field site. We conducted the initial vortexing, centrifugation,

287 and collection of supernatant (see section 2.2) at the SSR field station, which is likely where  
288 SSR-FL was contaminated. Due to this, we examine the mapping rates using only the RNAlater  
289 preserved samples. However, we were able to decontaminate reads bioinformatically, and  
290 include the decontaminated reads in downstream analyses where appropriate.

291 By sorting fecal samples with FACS, we substantially increased the percentage of reads  
292 mapping to the target genome. We selected five samples at random (SSR-CH, SSR-NM, SSR-  
293 LE, SSR-PR, SSR-SN) to compare pre- and post-FACS mapping rates. The mapping rates of  
294 unsorted feces ranged from 10 - 42%, with a median of 14% (Figure 3C). After flow sorting  
295 aliquots of these fecal samples, we obtained significantly higher mapping rates ( $V = 15$ ,  $p <$   
296  $0.05$ ) for each sample, ranging from 64 - 95%, with a median of 85%, resulting in a median 6.07  
297 fold enrichment.

298

### 299 3.3 High coverage fecal genome

300 Given that the sample SSR-ML had a high mapping percentage, a low rate of duplication,  
301 and was effectively free of human-specific mapping, we selected it for sequencing at high  
302 coverage. Using  $\frac{1}{2}$  of one HiSeq 4000 lane, we achieved an average coverage of  $\sim 12X$  across the  
303 *Cebus imitator* 1.0 genome.

304 When comparing the high coverage fecal and tissue genomes from the Santa Rosa site,  
305 we observed no substantial difference in quality, coverage, heterozygosity, or GC content  
306 (Figures 3 and 4). For each genome, the distribution of per site coverage followed a roughly  
307 normal distribution with a small number of positions uncovered ( $\sim 2\%$ ) (Figure 3A). Coverage  
308 along the largest scaffold from the *Cebus* genome was uniform in both tissue and fecal samples  
309 (Figure 3B). No obvious area of excessively high or low coverages is apparent in the fecal  
310 genome compared to that of the tissue derived genomes. Importantly, the fecal genome does not  
311 have any obvious gaps in coverage. Likewise, levels of heterozygosity were comparable between  
312 fecal and tissue genomes (Figure 3C, D). The fluctuating levels of heterozygosity across the  
313 largest genomic scaffold in 100 KB windows is highly similar for SSR-ML and SSR-CR (Figure  
314 3D), indicative of their close familial relationship. Finally, the distribution of GC content across  
315 the genome does not suffer from substantial bias (Figure 5B). Although the normalized coverage  
316 at the extremes of the GC distribution is on the higher end of the capuchin samples (Figure 5A),  
317 it falls well within the range of other samples for the vast majority of the genome where GC  
318 content ranges from  $\sim 20 - 75\%$  (Figure 5B).

319

### 320 3.4 Population structure

321 We observed likely population subdivision between the northern and southern groups of  
322 white-faced capuchins in our SNV set. This separation corresponds to the ecological division of  
323 the season tropical dry forests in the north from the non-seasonal tropical wet forests in the  
324 south. Given the limitations of the available sampling sites, it is possible that the appearance of  
325 an ecological divide is actually evidence of isolation by distance.

326 All individuals from the north and the south are sharply discriminated by the first  
327 principle component of the PCA (Figure 6A). The second component indicates a higher degree  
328 of genetic variation within the southern individuals. All the northern individuals form a tight  
329 cluster on the PCA plot, in contrast to those from the south, which are more widely dispersed  
330 along PC 2. Furthermore, the single individual from the northern site of Cañas clusters closely  
331 with the individuals from Santa Rosa, despite a geographic distance of more than 100 km, which  
332 suggests that isolation by distance might not be the sole reason for population differentiation. No



333 clustering was observed within the four individuals from the southern sites of Manuel Antonio  
334 and Quepos, apart from their separation from the northern individuals along PC 1. Because we  
335 generated the principal components with samples from the primary SNV set and projected the  
336 remaining samples (fecal flow FACS and tissue-based outgroups), the outgroup taxa are  
337 expected to fall in between the two main sampling clusters of white-faced capuchins. As  
338 expected, the three outgroup taxa (*C. albifrons*, *S. sciureus*, and *A. geoffroyi*) fall in the center of  
339 the PCA plot.

340 The pattern of clustering generated by our maximum likelihood SNV tree recapitulates  
341 the expected patterns of geographic distance and ecological separation in our sample (Figure 6).  
342 Among the white-faced capuchin monkeys, the northern and southern clades represent the main  
343 split in the tree. Each clade is subdivided according to the two sampling sites within the  
344 geographic/ecological regions. Furthermore, the three outgroup taxa split by the expected degree  
345 of evolutionary distance. These relationships are not perturbed by the fact that samples were a  
346 mixture of traditional tissue-based genomic libraries and libraries generated by fecal flow-FACS.  
347 This pattern is evident both within the northern sites and outgroup taxa. Additionally, depth of  
348 coverage does not appear to affect the pattern of clustering. Our sample ranged in coverage from  
349 less than 1X to greater than 50X. In spite of this, the pattern of geographic/ecological subdivision  
350 held.

351

352

## DISCUSSION

353

354 In this manuscript, we describe a novel use of FACS to isolate cells from the feces of  
355 free-ranging mammals for population and comparative genomics. We have demonstrated that  
356 fecal FACS is an effective means for: 1) the enrichment of endogenous DNA from non-invasive  
357 primate samples; 2) the generation of unbiased whole genomes at high coverage or low coverage  
358 sequencing libraries suitable for population genomic analysis. Isolating genome-scale  
359 information from non-invasively collected samples remains a major challenge in molecular  
360 ecology. Although DNA can be extracted readily from museum specimens and captive  
361 individuals (Guschanski et al., 2013; Prado-Martinez et al., 2013; van der Valk, Lona Durazo,  
362 Dalén, & Guschanski, 2017), the vast majority of the world's mammalian genomic diversity  
363 remains in free-ranging individuals. Our results indicate that fecal FACS has the potential for  
364 widespread application in molecular ecology and the broadening of non-invasive genomics for  
365 threatened and cryptic mammals.

366

### 4.1 Performance and cost-effectiveness

368 Current techniques to isolate whole genomic information from fecal samples depend  
369 upon the enrichment of endogenous DNA from extracted fDNA (Chiou & Bergey, 2018; Perry et  
370 al., 2010; Snyder-Mackler et al., 2016). While these methods have proven effective for SNV  
371 analyses, particularly at low coverage (Chiou, 2017; de Manuel et al., 2016; Wall et al., 2016),  
372 they remain of limited genomic scope. The total mapping rate of endogenous reads from the  
373 highest performing enrichment protocol is 57%, with a non-duplicate mapping rate of 38%  
374 (Snyder-Mackler et al., 2016). The median non-duplicate rate that we generated through FACS is  
375 63% (82% when including duplicates), substantially outperforming that of enrichment-based  
376 approaches. While sequencing costs have fallen dramatically in recent years, maximizing the  
377 proportion of non-duplicate reads in sequencing libraries remains a critical factor in determining  
378 the feasibility of sampling schemes. Studies that aim to sequence tens or hundreds of fecal

379 individuals at high coverage are simply not practical for most labs, given the current cost  
380 structure. We were able to isolate primate cells from feces for roughly \$40 per sample. Given  
381 that each sample required about 30 minutes of FACS time and three hours of wet lab preparation  
382 time (per batch of samples), a trained lab worker could prepare five to ten samples per day,  
383 presuming the availability of FACS resources. Although these costs of time and money are not  
384 negligible, this may be a justifiable expense for projects where the increased mapping rate and  
385 genomic coverage are desired.

386 While our fecal FACS method is effective in white-faced capuchin monkeys and  
387 Geoffroy's spider monkeys, we acknowledge that further validation in other species is warranted.  
388 Given the disparity in mapping rates between the capuchin and spider monkey samples, it is  
389 possible that cytometry protocols would need to be optimized toward the particularities of a  
390 given species' feces and conditions. Consistent with this notion is the fact that the fecal sample  
391 (SSR-SB1) with low mapping success, was substantially darker than the other capuchin samples,  
392 which, depending on the dietary items consumed, typically have a green, brown, or rust  
393 coloration. Mapping was substantially improved in the replicate sample (SSR-SB2), which was  
394 collected on a different day. Curiously, we did not observe a relationship between the number of  
395 sorted cells and the concentration of extracted DNA. However, this is likely explained by  
396 residual intercalating dyes used in FACS process remaining in the sorted cells and interfering  
397 with Qubit quantification (Kuderna et al., 2018). Additionally, it is peculiar that the mapping  
398 rates of the libraries we built from unsorted fDNA were so high (median 14%). Typically, less  
399 than 5% of fDNA is of an endogenous source, although some chimpanzee samples have been  
400 reported to have up to 25% endogenous reads (Hernandez-Rodriguez et al., 2017). Further  
401 testing of capuchin fecal samples with lower endogenous DNA concentration is worth pursuing,  
402 as mapping rates for endogenous DNA from unprocessed and enriched fDNA are often  
403 correlated (Chiou & Bergey, 2018; Hernandez-Rodriguez et al., 2017; Snyder-Mackler et al.,  
404 2016). However, because cell sorting is not a targeted DNA enrichment process, we find it  
405 unlikely that post-FACS mapping rates should depend on the concentration of endogenous  
406 fDNA; accordingly, we did not observe any such relationship among the five samples we tested  
407 for enrichment (Figure 3C). Furthermore, we did not observe a correlation between the number  
408 of isolated cells and the mapping rate; in one case, we obtained a 94% mapping rate with only  
409 140 cells. Presuming that the flow cytometer is sorting cells correctly, and that those cells  
410 contain viable DNA, the mapping rate should only be contingent upon the accuracy of the cell  
411 sorting process.

412 We have demonstrated that RNAlater is an effective, long-term, room-temperature  
413 cellular storage medium for fecal FACS. In the great majority of cases, FACS involves the  
414 sorting of living cellular populations, and attempts to sort dead cells are often met with  
415 skepticism (Sasaki, Dumas, & Engleman, 1987). Dead cells are typically distorted and  
416 fragmented, yielding populations that are difficult to discriminate. We attempted to freeze fresh  
417 feces with liquid nitrogen and a betaine cryopreservative, following the single-cell protocol of  
418 Rinke et al. (2014). Unfortunately, many of these samples contained extremely large amounts of  
419 cellular debris, likely from improper cryopreservation in field conditions. Additionally,  
420 cryopreservation of samples required a non-trivial amount of laboratory preparation in non-  
421 sterile field conditions that we believe introduced substantial human contamination to SSR-FL.  
422 While we were able to sequence one of the frozen samples (SSR-ML) at high coverage and  
423 replicate it with RNAlater, we cannot presently recommend in-field cryopreservation of fecal  
424 samples for FACS. RNAlater is often commonly used in molecular field primatology, because it

425 offers long-term, stable preservation of host DNA at room temperature. For our purposes, it also  
426 offered the distinct advantage of not requiring any in-field laboratory preparation, which  
427 minimized human contamination of our cellular populations. Attempts to flow sort RNAlater  
428 preserved cells of any origin are extremely scant, and we only found two such studies in the  
429 literature (Barrett et al., 2002; Zaitoun, Erickson, Schell, & Epstein, 2010). We observed a  
430 substantial improvement in the cellular integrity in the RNAlater preserved samples. Although  
431 cells preserved in RNAlater are dead, they suffer minimal histological disruption, and maintain  
432 cellular epitopes critical for antibody binding (Florell et al., 2001). Given this array of benefits,  
433 we recommend preservation of fresh fecal samples in RNAlater when collected in field  
434 conditions.

435

#### 436 4.2 Quality and feasibility of high-coverage fecal genomics

437 We have presented the first high-coverage, unbiased mammalian genome, derived  
438 exclusively from feces. While traditional bait-and-capture approaches to non-invasive genomics  
439 have allowed for broad sampling of the mammalian genome from feces, such methods remain  
440 limited by genomic bias. When compared to tissue-derived capuchin genomes, our FACS-  
441 derived fecal genome indicates no such biases. SSR-ML consistently fell within or immediately  
442 adjacent to the observable range of variation of the other tissue samples collected from Sector  
443 Santa Rosa. While we acknowledge that it would have been optimal to compare high-coverage  
444 whole genomes generated from the blood and feces of the same individual, this was not possible,  
445 because of our non-invasive sampling strategy. Nonetheless, we are able to infer such a  
446 comparison through the use of pedigree data in our SSR samples. The scaffold-wide pattern of  
447 heterozygosity observable in SSR-ML (Figure 4D) is nearly identical to that of SSR-CR (tissue),  
448 who was his sibling. This relationship is further supported by the population clustering results  
449 (section 4.3). Furthermore, the SSR-ML sample we used in SNV calling did not bear any  
450 indication of human contamination. In order to remain consistent in comparison with the tissue  
451 and blood derived samples, we did not remove reads mapping to the hg38 with BBsplit during  
452 SNV calling. Because the *Cebus* genome is less complete than hg38, it is likely that the majority  
453 of human-specific mapping from this and other samples is artifactual. Given the consistency  
454 similarity of the SSR-ML sample to the others from SSR, we and suggest that FACS is a viable  
455 approach to expand the horizons of non-invasive population and conservation genomics.

456 Prior to selecting libraries for high-coverage sequencing, we suggest that multiple  
457 libraries should be run on a lower throughput sequencing platform (e.g. MiSeq). Given the  
458 variability in sequencing outcomes inherent in our technique, it would be prudent to avoid  
459 wasting sequencing capacity on libraries that lack the requisite diversity for high-depth  
460 sequencing. Working with extremely low numbers of cells, which is sometimes the result of the  
461 FACS process, can result non-trivial duplication rates and the potential for the introduction of  
462 human contaminants. Given that our FACS protocol only requires a small amount of fecal slurry,  
463 processing two or three aliquots from the same fecal sample would increase the number of cells  
464 and, presumably, the available diversity in cases where it was deemed necessary.

465

#### 466 4.3 Population structure of white-faced capuchin monkeys

467 By successfully discriminating among two populations of white-faced capuchins in Costa  
468 Rica, we have demonstrated that fecal FACS is effective for low-coverage applications of  
469 population and conservation genomics. While bait-and-capture approaches remain a valuable

470 tool for the assessment of population genetic structure from real-world distributions of free-  
471 ranging mammals, fecal FACS provides a simple alternative approach.

472 The clustering patterns in our trees and PCA plots do not reveal any samples that deviate  
473 from their expected geographic or ecological origin. These relationships are robust to both the  
474 coverage levels (< 1X to > 50X) and biological origins (feces, tissue, and blood) of the samples.  
475 The tight geographic clustering of individuals within the SSR sampling locale provides  
476 reasonable evidence that there is no substantial effect from fecal FACS on population structure.  
477 Were it the case that fecal FACS introduced substantial bias, we would have expected the fecal  
478 samples from SSR to plot in a separate cluster from those of tissue origin. As fecal and tissue  
479 samples fall in the same general cluster, this is no evidence of such an effect. Furthermore,  
480 known pedigree information from SSR corresponds to the genetic relationships observed in our  
481 SNV tree. SSR-ML (fecal) and SSR-CR (tissue) form an internal clade in the tree (sixth and  
482 seventh points from the top). These two individuals also cluster adjacent to each other on the  
483 PCA plot.

484

#### 485 4.4 Summary

486 Through a novel use of flow cytometry/FACS, we have developed a new method for the  
487 isolation of epithelial cells from mammalian feces for population genomics. We generated the  
488 first high-coverage, unbiased mammalian genome solely from feces. Additionally, we have  
489 demonstrated that fecal FACS can be used to generate low coverage SNP datasets that function  
490 well in population assignment and clustering algorithms. Fecal FACS is cost-effective and free  
491 of the biases that commonly occur in traditional bait-and-capture approaches to the enrichment  
492 of endogenous DNA from feces. Furthermore, fecal FACS does not require costly impractical  
493 preservation of biomaterial in liquid nitrogen; rather, we rely on room-temperature stable storage  
494 in RNAlater. Fecal FACS offers great benefits to the field of mammalian conservation and  
495 population genomics.

496

497

### AUTHOR CONTRIBUTIONS

498

499 Research was designed by JDO, ADM, RK and JC; performed by JDO, RK, CF, LFKK, EL, and  
500 JT; analyzed by JDO and MM; and written by JDO, ADM, and TMB.

501

502

### DATA ACCESSIBILITY STATEMENT

503

504 Sequencing data will be archived on NCBI SRA and made publically available.

505

506

### ACKNOWLEDGEMENTS

507

508 We would like to thank Laurie Kennedy, Yiping Liu from the University of Calgary Flow  
509 Cytometry Core for their patience and assistance with developing this protocol. Additionally, we  
510 thank Jene Weatherhead, Shelley Wegener, Frank Visser, Gwen Duytschaever for molecular  
511 laboratory assistance. We acknowledge Oscar Fornas for helpful discussion. Thanks to Wes  
512 Warren, Pat Minx, Mike Montague, Shoji Kawamura, and J. Pedro Magalhaes for their  
513 involvement with the development of the *Cebus imitator* reference genome. PJ Perry, Shasta  
514 Webb, Rachel Williamson, and Saul Cheves Hernandez assisted with sample acquisition. This  
515 research was supported by the National Sciences and Engineering Research Council of Canada

516 (NSERC), and the Canada Research Chairs program to ADM. TMB is supported by BFU2017-  
517 86471-P (MINECO/FEDER, UE), Howard Hughes International Early Career, Obra Social "La  
518 Caixa" and Secretaria d'Universitats i Recerca del Departament d'Economia i Coneixement de la  
519 Generalitat de Catalunya. JDO is supported by the Alberta Children's Hospital Research Institute  
520 (ACHRI). CF is supported by "La Caixa" PhD fellowship. L.F.K.K. is supported by an FPI  
521 fellowship associated with BFU2014-55090-P (MINECO/FEDER, UE)  
522  
523



524  
525

## FIGURES

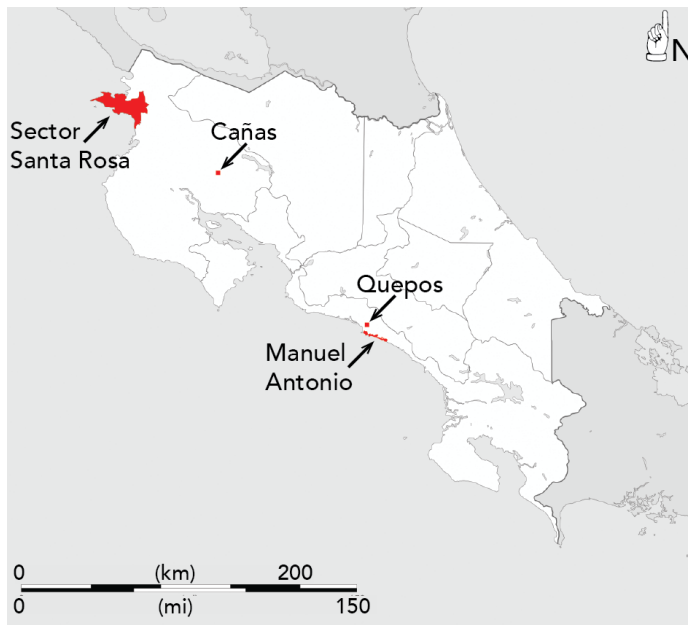

526  
527  
528  
529  
530  
531  
532

**Figure 1:** Map of sampling sites. Sector Santa Rosa (SSR) and Cañas are situated in the northern dry forest and samples from Quepos and Manuel Antonio are from the southern wet forest. Map courtesy of Eric Gaba—Wikimedia Commons user: Sting.

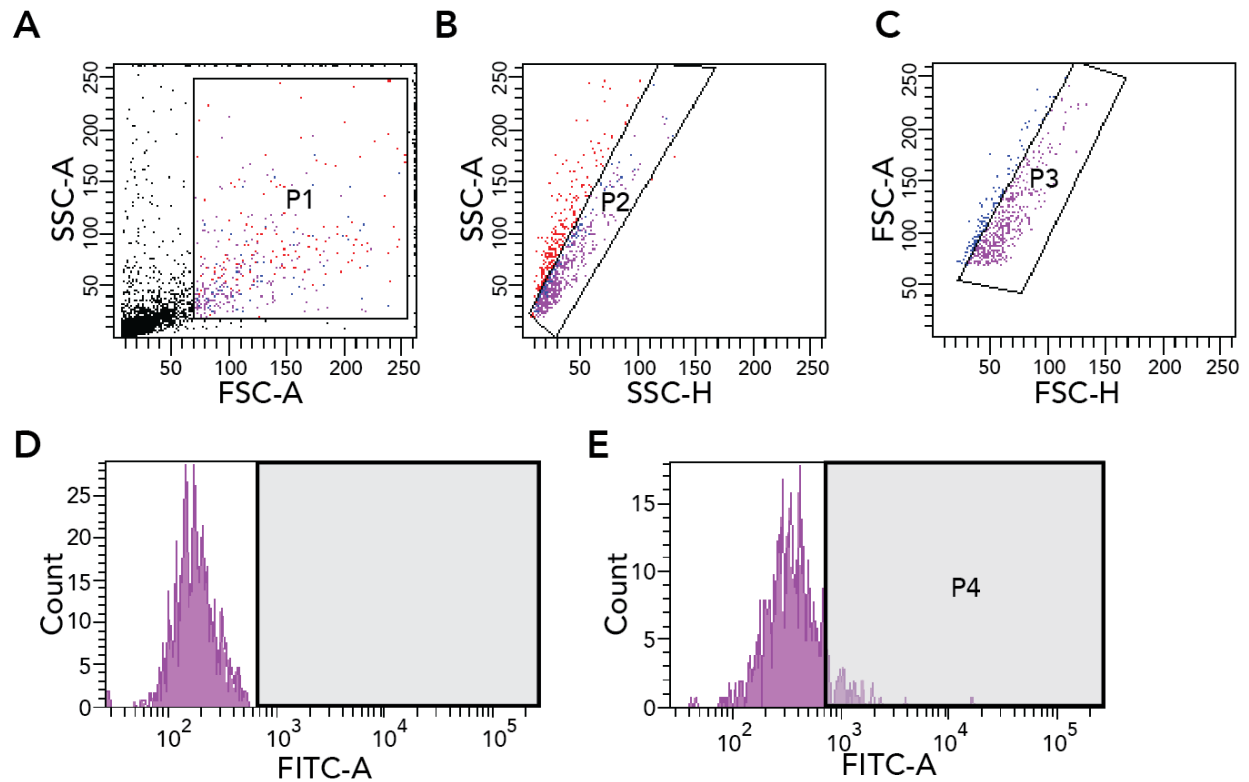

533  
534

535 **Figure 2:** FACS gating strategy. Cells were gated first by size and complexity to avoid bacteria  
536 and cellular debris (A), followed by discrimination of cellular agglomerations (B and C).  
537 Fluorescence of AE1/AE3 Anti-Pan Cytokeratin Alexa Fluor® 488 antibody (FITC-A) is  
538 depicted in unstained (D) and stained (E) cellular populations. Epithelial cells were identified as  
539 those fluorescing beyond background levels, as depicted in the P4 gate.  
540

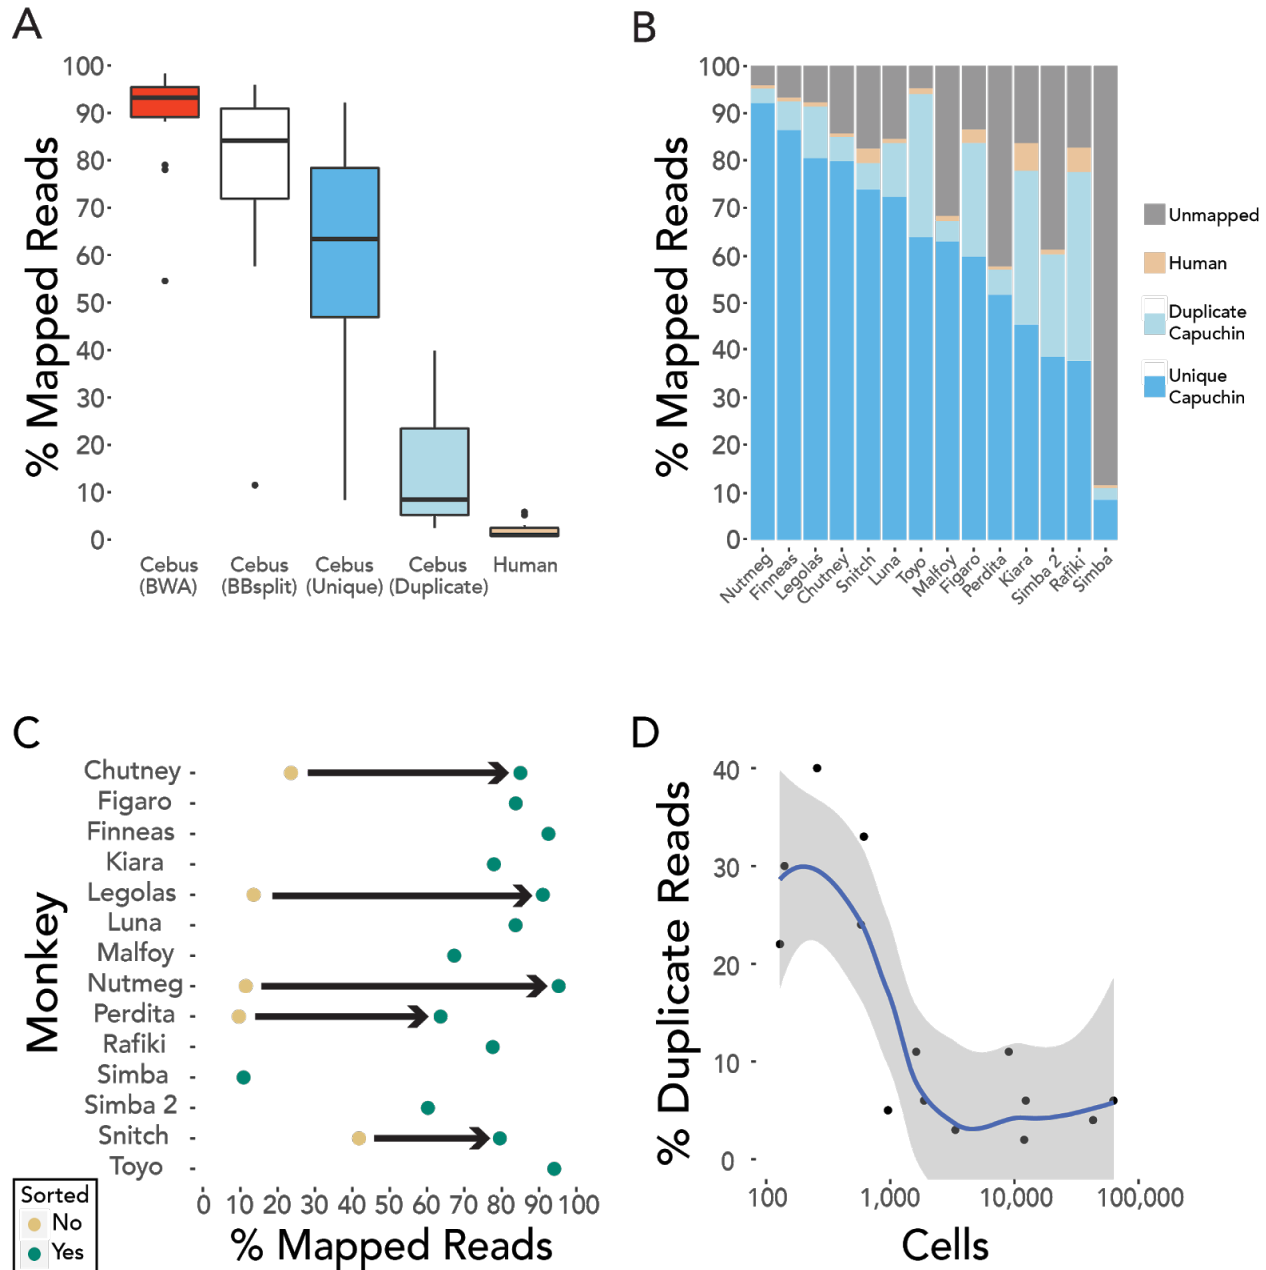

541  
542

543 **Figure 3:** Mapping percentages of sequencing reads from RNAlater preserved fDNA libraries  
544 prepared with FACS for A) all samples, and B) individual libraries. C) Increase in mapping rate  
545 for RNAlater preserved samples. D) Relationship between mapped read duplication and number  
546 of cells with LOESS smoothing. The duplicate rate decreases sharply once a threshold of about  
547 1,000 cells is reached.

548

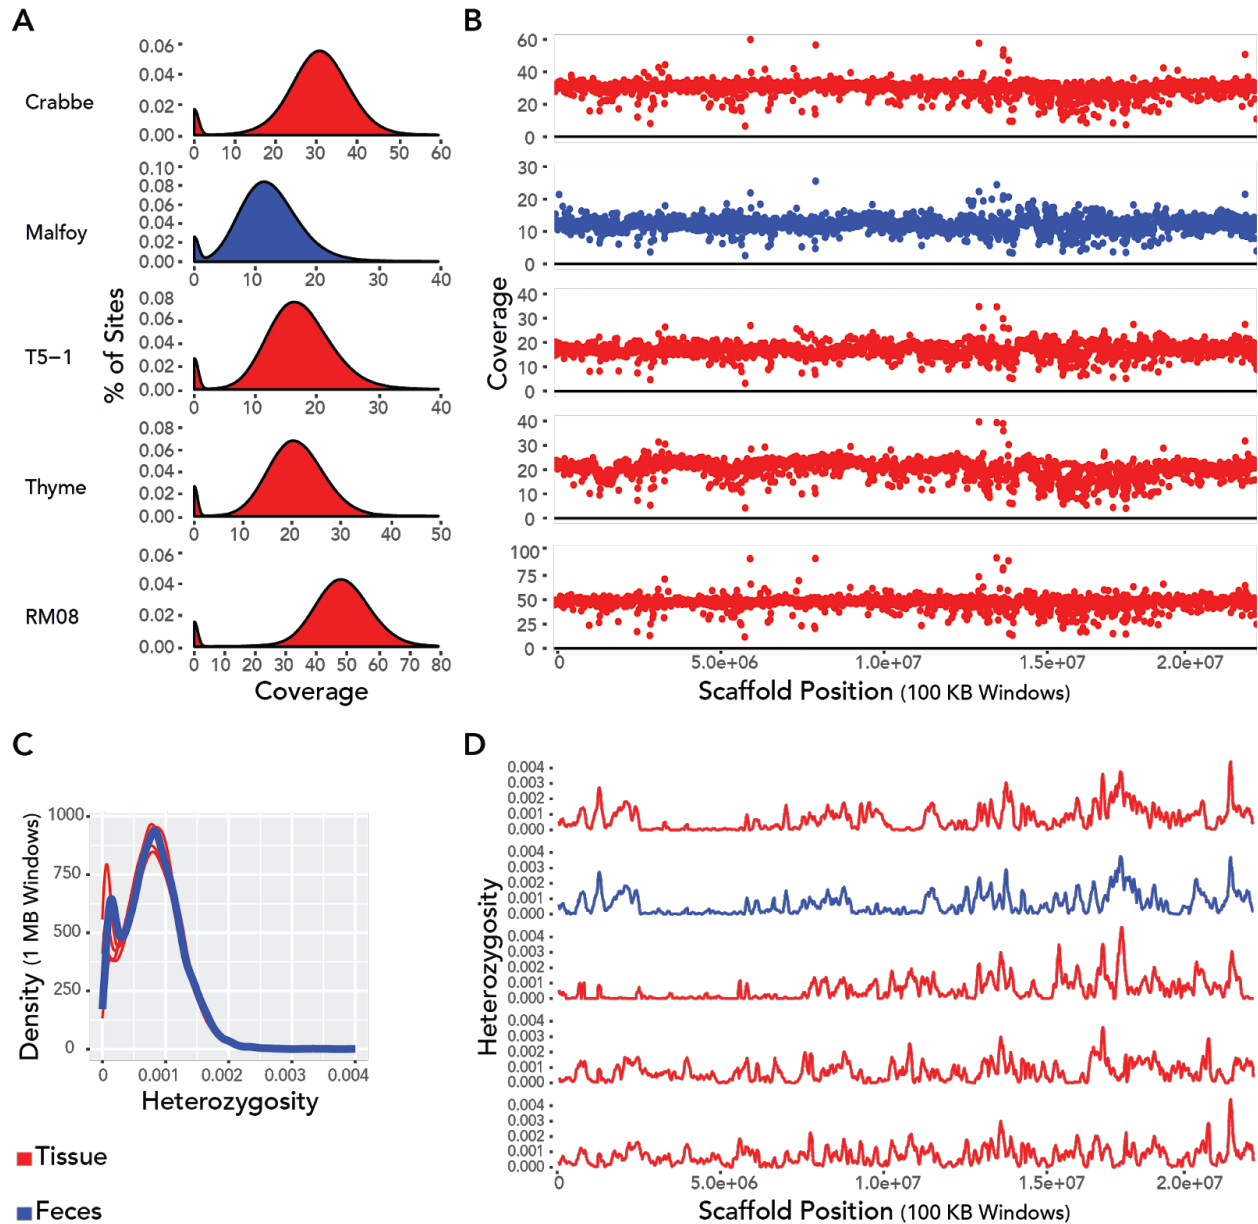

549  
550

551 **Figure 4:** A) Density of genomic coverage of high coverage genomes from Santa Rosa. B)  
552 Average coverage per 100 KB window along the largest scaffold of the *C. imitator* 1.0 reference  
553 genome. C) Density of 1 MB windows at varying levels of heterozygosity along the entire  
554 genome. D) Heterozygosity of 100 KB windows along the largest scaffold of the *C. imitator* 1.0  
555 reference genome. The top two genomes (SSR-CR and SSR-ML) are from siblings. The order of  
556 individuals in figures B and D correspond to that of figure A.  
557

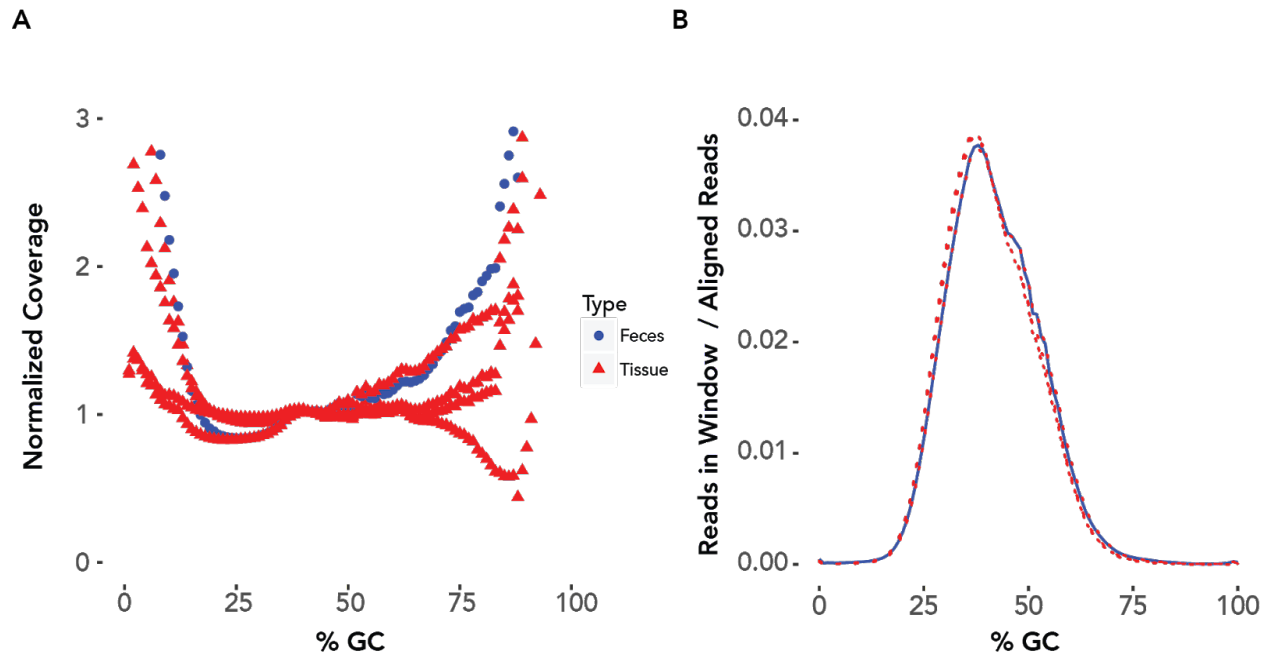

558  
559

560 **Figure 5:** Percent of GC content across the genome for the four tissue (red) and one fecal (blue)  
561 samples from Sector Santa Rosa. GC content does not substantially differ for each type of  
562 sample. A) Average normalized coverage at each percentage of GC. B) Number of reads per 100  
563 bp window (scaled by the number aligned reads) at each percentage of GC.

564  
565



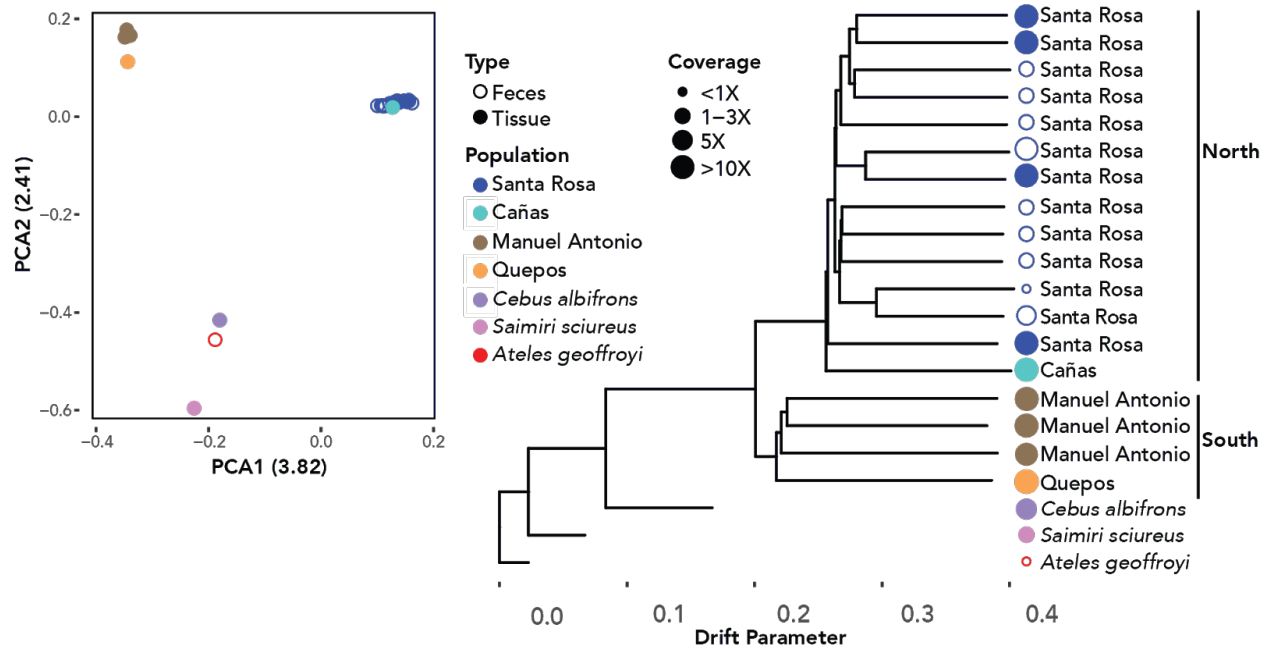

566  
567

568 **Figure 6:** Left: Principal components of 14 fecal and 10 blood/tissue libraries from white faced  
569 capuchin and three outgroups. Right: Maximum likelihood tree of 9 fecal and 10 blood/tissue  
570 libraries. Samples with less 0.5X coverage were excluded. Among the white-faced capuchin  
571 samples, individuals from northern (dry forest) and southern (wet forest) regions form the  
572 primary split; secondary splits reflect the individuals from different sites within regions.  
573

574  
575  
576  
577

TABLES:

Table 1: Origins and preservation information for *Cebus imitator* samples.

| Sample   | Region | Site              | Sample Type | Preservation |
|----------|--------|-------------------|-------------|--------------|
| SSR-NM   | North  | Sector Santa Rosa | Feces       | RNAlater     |
| SSR-TY   | North  | Sector Santa Rosa | Feces       | RNAlater     |
| SSR-FN   | North  | Sector Santa Rosa | Feces       | RNAlater     |
| SSR-LE   | North  | Sector Santa Rosa | Feces       | RNAlater     |
| SSR-CH   | North  | Sector Santa Rosa | Feces       | RNAlater     |
| SSR-FG   | North  | Sector Santa Rosa | Feces       | RNAlater     |
| SSR-LU   | North  | Sector Santa Rosa | Feces       | RNAlater     |
| SSR-SN   | North  | Sector Santa Rosa | Feces       | RNAlater     |
| SSR-KI   | North  | Sector Santa Rosa | Feces       | RNAlater     |
| SSR-RF   | North  | Sector Santa Rosa | Feces       | RNAlater     |
| SSR-ML   | North  | Sector Santa Rosa | Feces       | RNAlater     |
| SSR-PR   | North  | Sector Santa Rosa | Feces       | RNAlater     |
| SSR-SB1  | North  | Sector Santa Rosa | Feces       | RNAlater     |
| SSR-SB2  | North  | Sector Santa Rosa | Feces       | RNAlater     |
| SSR-ML   | North  | Sector Santa Rosa | Feces       | Frozen       |
| SSR-FL   | North  | Sector Santa Rosa | Feces       | Frozen       |
| SSR-CR   | North  | Sector Santa Rosa | Tissue      | Frozen       |
| SSR-FL   | North  | Sector Santa Rosa | Tissue      | Frozen       |
| SSR-TH   | North  | Sector Santa Rosa | Tissue      | Frozen       |
| SSR-T5-1 | North  | Sector Santa Rosa | Tissue      | Frozen       |
| SSR-RM08 | North  | Sector Santa Rosa | Tissue      | Frozen       |
| CNS-HE   | North  | Cañas             | Blood       | Frozen       |
| KSTR29   | South  | Manuel Antonio    | Blood       | Frozen       |
| KSTR116  | South  | Manuel Antonio    | Blood       | Frozen       |
| KSTR159  | South  | Manuel Antonio    | Blood       | Frozen       |
| KSTR64   | South  | Quepos            | Blood       | Frozen       |

578  
579

580 **Table 2:** FACS and mapping results from *Cebus* and *Ateles* fecal samples  
 581

| Monkey | Library                  | Cells | PCR Cycles | Total DNA (ng) | % Mapping |                      |                     |                        |               | X Coverage |
|--------|--------------------------|-------|------------|----------------|-----------|----------------------|---------------------|------------------------|---------------|------------|
|        |                          |       |            |                | BWA mem   | BBsplit <i>Cebus</i> | Unique <i>Cebus</i> | Duplicate <i>Cebus</i> | BBsplit Human |            |
| SSR-ML | SSR-ML Frozen            | 2546  | 11         | 10.50          | 96        | 90                   | 85                  | 5                      | 1.25          | 11.7       |
| SSR-FL | SSR-FL                   | 4405  | 12         | 6.72           | 80        | 42                   | 40                  | 3                      | 15.77         | 4.4        |
| SSR-FN | SSR-FN                   | 62601 | 8          | 21.50          | 97        | 93                   | 86                  | 6                      | 0.81          | 2.8        |
| SSR-FG | SSR-FG                   | 580   | 10         | 9.75           | 94        | 84                   | 60                  | 24                     | 2.86          | 2.0        |
| SSR-LU | SSR-LU                   | 8998  | 10         | 8.00           | 93        | 84                   | 72                  | 11                     | 0.89          | 2.0        |
| SSR-ML | SSR-ML RNAlater          | 42837 | 10         | 8.26           | 88        | 67                   | 63                  | 4                      | 1.08          | 1.9        |
| SSR-TY | SSR-TY                   | 140   | 10         | 7.70           | 98        | 94                   | 64                  | 30                     | 1.24          | 1.5        |
| SSR-SB | SSR-SB 2                 | 129   | 10         | 9.00           | 79        | 60                   | 39                  | 22                     | 1.00          | 1.1        |
| SSR-SB | SSR-SB 1                 | 11944 | 10         | 6.25           | 55        | 11                   | 8                   | 2                      | 0.61          |            |
| SSR-KI | SSR-KI                   | 612   | 10         | 9.00           | 93        | 78                   | 45                  | 33                     | 5.80          | 1.0        |
| SSR-RF | SSR-RF                   | 257   | 10         | 10.00          | 92        | 78                   | 38                  | 40                     | 5.18          | 0.7        |
| SSR-NM | SSR-NM                   | 3336  | 11         | 3.38           | 98        | 95                   | 92                  | 3                      | 0.66          | 0.4        |
| SSR-CH | SSR-CH                   | 957   | 11         | 4.06           | 93        | 85                   | 80                  | 5                      | 0.74          | 0.4        |
| SSR-LE | SSR-LE                   | 1612  | 11         | 2.96           | 96        | 91                   | 81                  | 11                     | 0.91          | 0.3        |
| SSR-SN | SSR-SN                   | 1866  | 11         | 3.96           | 92        | 79                   | 74                  | 6                      | 3.07          | 0.2        |
| SSR-PR | SSR-PR                   | 12316 | 11         | 3.13           | 78        | 64                   | 58                  | 6                      | 0.68          | 0.1        |
| Spider | Spider 1                 | 4026  | 12         | 6.96           | 54        | 12                   | 11                  | 1                      | 2.83          | 0.4        |
|        | Spider 2                 | 602   | 11         | 4.50           | 49        | 12                   | 10                  | 1                      | 1.82          |            |
|        | Median ( <i>Cebus</i> )* | 2079  |            | 7.85           | 93        | 82                   | 63                  | 6                      | 1             |            |

582  
 583  
 584  
 585

586  
587  
588  
589  
590  
591  
592  
593  
594  
595  
596  
597  
598  
599  
600  
601  
602  
603  
604  
605  
606  
607  
608

## REFERENCES

- Arandjelovic, M., & Vigilant, L. (2018). Non-invasive genetic censusing and monitoring of primate populations. *American Journal of Primatology*. doi:10.1002/ajp.22743
- Barrett, M. T., Glogovac, J., Prevo, L. J., Reid, B. J., Porter, P., & Rabinovitch, P. S. (2002). High-quality RNA and DNA from flow cytometrically sorted human epithelial cells and tissues. *BioTechniques*, 32(4), 888–90, 892, 894, 896.
- Bolger, A. M., Lohse, M., & Usadel, B. (2014). Trimmomatic: a flexible trimmer for Illumina sequence data. *Bioinformatics*, 30(15), 2114–2120.
- Bushnell, B. (2016). BBMap short read aligner. *University of California, Berkeley, California*. URL [Http://sourceforge.net/projects/bbmap](http://sourceforge.net/projects/bbmap).
- Chiou, K. L. (2017). *Population Genomics of a Baboon Hybrid Zone in Zambia* (PhD Thesis). Washington University in St. Louis. Retrieved from <https://doi.org/10.7936/K7348HS3>
- Chiou, K. L., & Bergey, C. M. (2018). Methylation-based enrichment facilitates low-cost, noninvasive genomic scale sequencing of populations from feces. *Scientific Reports*, 8(1), 1975.
- Corlett, R. T. (2017). A Bigger Toolbox: Biotechnology in Biodiversity Conservation. *Trends in Biotechnology*, 35(1), 55–65.
- de Manuel, M., Kuhlwilm, M., Frandsen, P., Sousa, V. C., Desai, T., Prado-Martinez, J., ... Marques-Bonet, T. (2016). Chimpanzee genomic diversity reveals ancient admixture with bonobos. *Science*, 354(6311), 477–481.
- Fedigan, L., & Rose-Wiles, L. (1996). See how they grow: Tracking capuchin monkey populations in a regenerating Costa Rican dry forest. In M. A. Norconk, A. L. Rosenberger, & P. A. Garber (Eds.), *Adaptive radiations of Neotropical primates* (pp. 289–307). Springer.

- 609 Florell, S. R., Coffin, C. M., Holden, J. A., Zimmermann, J. W., Gerwels, J. W., Summers, B.  
610 K., ... Leachman, S. A. (2001). Preservation of RNA for functional genomic studies: a  
611 multidisciplinary tumor bank protocol. *Modern Pathology: An Official Journal of the United*  
612 *States and Canadian Academy of Pathology, Inc*, 14(2), 116–128.
- 613 Guschanski, K., Krause, J., Sawyer, S., Valente, L. M., Bailey, S., Finstermeier, K., ...  
614 Savolainen, V. (2013). Next-generation museomics disentangles one of the largest primate  
615 radiations. *Systematic Biology*, 62(4), 539–554.
- 616 Hernandez-Rodriguez, J., Arandjelovic, M., Lester, J., de Filippo, C., Weihmann, A., Meyer,  
617 M., ... Marques-Bonet, T. (2017). The impact of endogenous content, replicates and pooling  
618 on genome capture from faecal samples. *Molecular Ecology Resources*. doi:10.1111/1755-  
619 0998.12728
- 620 Kuderna, L. F. K., Lizano, E., Julia, E., Gomez-Garrido, J., Serres-Armero, A., Kuhlwilm, M., ...  
621 Marques-Bonet, T. (2018, June 13). *Selective single molecule sequencing and assembly of a*  
622 *human Y chromosome of African origin*. *bioRxiv*. doi:10.1101/342667
- 623 Li, H., & Durbin, R. (2009). Fast and accurate short read alignment with Burrows-Wheeler  
624 transform. *Bioinformatics*, 25(14), 1754–1760.
- 625 McKenna, A., Hanna, M., Banks, E., Sivachenko, A., Cibulskis, K., Kernytzky, A., ... DePristo,  
626 M. A. (2010). The Genome Analysis Toolkit: a MapReduce framework for analyzing next-  
627 generation DNA sequencing data. *Genome Research*, 20(9), 1297–1303.
- 628 Perry, G. H. (2014). The Promise and Practicality of Population Genomics Research with  
629 Endangered Species. *International Journal of Primatology*, 35(1), 55–70.
- 630 Perry, G. H., Marioni, J. C., Melsted, P., & Gilad, Y. (2010). Genomic-scale capture and  
631 sequencing of endogenous DNA from feces. *Molecular Ecology*, 19(24), 5332–5344.



- 632 Pickrell, J. K., & Pritchard, J. K. (2012). Inference of population splits and mixtures from  
633 genome-wide allele frequency data. *PLoS Genetics*, *8*(11), e1002967.
- 634 Prado-Martinez, J., Sudmant, P. H., Kidd, J. M., Li, H., Kelley, J. L., Lorente-Galdos, B., ...  
635 Marques-Bonet, T. (2013). Great ape genetic diversity and population history. *Nature*,  
636 *499*(7459), 471–475.
- 637 Price, A. L., Patterson, N. J., Plenge, R. M., Weinblatt, M. E., Shadick, N. A., & Reich, D.  
638 (2006). Principal components analysis corrects for stratification in genome-wide association  
639 studies. *Nature Genetics*, *38*(8), 904–909.
- 640 Rinke, C., Lee, J., Nath, N., Goudeau, D., Thompson, B., Poulton, N., ... Woyke, T. (2014).  
641 Obtaining genomes from uncultivated environmental microorganisms using FACS-based  
642 single-cell genomics. *Nature Protocols*, *9*(5), 1038–1048.
- 643 Sasaki, D. T., Dumas, S. E., & Engleman, E. G. (1987). Discrimination of Viable and Non-  
644 Viable Cells Using Propidium Iodide in Two Color Immunofluorescence. *Alan R. Liss, Inc.*  
645 *Cytometry*, *8*, 413–420.
- 646 Snyder-Mackler, N., Majoros, W. H., Yuan, M. L., Shaver, A. O., Gordon, J. B., Kopp, G. H., ...  
647 Tung, J. (2016). Efficient Genome-Wide Sequencing and Low-Coverage Pedigree Analysis  
648 from Noninvasively Collected Samples. *Genetics*, *203*(2), 699–714.
- 649 van der Valk, T., Lona Durazo, F., Dalén, L., & Guschanski, K. (2017). Whole mitochondrial  
650 genome capture from faecal samples and museum-preserved specimens. *Molecular Ecology*  
651 *Resources*, *17*(6), e111–e121.
- 652 Wall, J. D., Schlebusch, S. A., Alberts, S. C., Cox, L. A., Snyder-Mackler, N., Nevenon, K.  
653 A., ... Tung, J. (2016). Genomewide ancestry and divergence patterns from low-coverage

654 sequencing data reveal a complex history of admixture in wild baboons. *Molecular Ecology*,  
655 25(14), 3469–3483.

656 Zaitoun, I., Erickson, C. S., Schell, K., & Epstein, M. L. (2010). Use of RNAlater in  
657 fluorescence-activated cell sorting (FACS) reduces the fluorescence from GFP but not from  
658 DsRed. *BMC Research Notes*, 3, 328.
